# Supplementary material for: Implementation gap and influencing factors of exercise prescription for older adults: A large-scale survey of healthcare professionals in China
Source: Research Square preprint supplement (doi:10.21203/rs.3.rs-6464565/v1), 2025-06-09
Supplement: Supplementary file 1 [file 1872f9a2a34e72af3e265079.docx]

**Supplementary materials**

**Table S1: Questionnaire Sources Classified by City Level**

| **Level of working city** | **Actual number of cities in China (N=337)** | **Number of cities included in this survey (N=164)** | **City Coverage proportion (%)** | **Names of cities represented in this survey** | **Number of questionnaires (N=1890)** |
| --- | --- | --- | --- | --- | --- |
| **First-tier Cities** | 19 | 16 | 84.21% | Beijing, Shanghai, Guangzhou, Chengdu, Hangzhou, Chongqing, Wuhan, Xi'an, Suzhou, Tianjin, Nanjing, Changsha, Zhengzhou, Qingdao, Ningbo, Foshan | 402 |
| **Second-tier Cities** | 30 | 30 | 100% | Kunming, Shenyang, Jinan, Xiamen, Wenzhou, Jinhua, Harbin, Dalian, Shijiazhuang, Guiyang, Nanchang, Jiaxing, Taiyuan, Baoding, Linyi, Lanzhou, Shaoxing, Weifang, Yantai | 873 |
| **Third-tier and Below Cities** | 288 | 118 | 40.97% | Taizhou, Haikou, Urumqi, Luoyang, Liaocheng, Huzhou, Jining, Hohhot, Ganzhou, Tangshan, Yinchuan, Taizhou, Zunyi, Jiangmen, Wuhu, Zibo, Mianyang, Heze, Hengyang, Xiangyang, Yichang, Yueyang, Zhaoqing, Chuzhou, Weihai, Dezhou, Tai'an, Anyang, Anqing, **etc.** | 615 |

**City Coverage Proportion (%)= Number of cities represented in this survey / Actual Number of Cities in China*100%**

**Table S2 Results of Pearson’s correlation Analysis**

|  | **Training** | **Knowledge** | **Attitude** | **Prescription** |
| --- | --- | --- | --- | --- |
| **Training** | - |  |  |  |
| **Knowledge** | 0.3771 | - |  |  |
| **Attitude** | 0.1691 | 0.1761 | - |  |
| **Prescription** | 0.3086 | 0.409 | 0.1484 | - |

**Note:** ****p* < 0.001

**Table S3 Results of Mediation Analysis**

|  | **Coeff. (β)** | **Std. Err.** | **t value** | ***p* value** | **95% CI**  **(LLCI, ULCI)** |
| --- | --- | --- | --- | --- | --- |
| **Total effect** | 0.4812 | 0.0343 | 14.0163 | <0.001 | (0.4139, 0.5486) |
| **Direct effect** | 0.2701 | 0.0351 | 7.6946 | <0.001 | (0.2012, 0.3389) |
| **Indirect effect** |  |  |  |  |  |
| Training → Knowledge → Exercise prescription | 0.1950 | 0.0180 | a | a | (0.1612, 0.2305) |
| Training → Attitude → Exercise prescription | 0.0116 | 0.0046 | a | a | (0.0031, 0.0210) |
| Training → Knowledge → Attitude → Exercise prescription | 0.0046 | 0.0019 | a | a | (0.0012, 0.0088) |

**Abbreviations:** LLCI, lower level for confidence interval; ULCI, upper level for confidence interval

**Note:** a Statistics not applicable when assessing indirect effect

**Table S4 Ordinal Logistic Regression Analysis of Exercise Prescription and Associated Variables Among Doctors**

|  | **Univariable analysis** |  |  | **Multivariable analysis** |  |
| --- | --- | --- | --- | --- | --- |
| **Variables** | **OR (95% CI)** | ***p* value** | **Variables** | **OR (95% CI )** | ***p* value** |
| **Sex** |  |  | **Level of the hospital** |  |  |
| Male | Reference (1.00) |  | Tertiary hospital | Reference (1.00) |  |
| Female | 1.05 (0.81, 1.35) | 0.736 | Secondary hospital | **0.72 (0.53, 0.98)** | **0.038** |
| **Education level** |  |  | Primary hospital | 1.07 (0.67, 1.71) | 0.767 |
| Associate degree or below | Reference (1.00) |  | **Department** |  |  |
| Undergraduate degree | 0.96 (0.48, 1.90) | 0.899 | Geriatrics | Reference (1.00) |  |
| Postgraduate degree or above | 1.20 (0.60, 2.41) | 0.607 | General practice | 1.18 (0.75, 1.85) | 0.485 |
| **Level of working city** |  |  | Internal medicine | 0.75 (0.53, 1.07) | 0.112 |
| First-tier cities | Reference (1.00) |  | Others | 0.92 (0.59, 1.44) | 0.714 |
| Second-tier cities | 0.85 (0.62, 1.18) | 0.338 | **Years of experience group, years** |  |  |
| Third-tier and below cities | 0.86 (0.61, 1.23) | 0.418 | **<10** | Reference (1.00) |  |
| **Level of working hospital** |  |  | **10-20** | 1.16 (0.81, 1.66) | 0.428 |
| Tertiary hospital | Reference (1.00) |  | **≥ 20** | **1.53 (1.08, 2.17)** | **0.016** |
| Non-tertiary hospital | **0.67 (0.51, 0.89)** | **0.005** | **Training** |  |  |
| Primary hospital | 1.15 (0.82, 1.63) | 0.421 | **Not trained** |  |  |
| **Department** |  |  | **Trained** | **3.88 (2.96, 5.09)** | **<0.001** |
| Geriatrics | Reference (1.00) |  |  |  |  |
| General practice | 1.21 (0.86, 1.71) | 0.270 |  |  |  |
| Internal medicine | 0.62 (0.45, 0.86) | 0.004 |  |  |  |
| Others | 0.74 (0.50, 1.10) | 0.133 |  |  |  |
| **Years of working experience, years** |  |  |  |  |  |
| <10 | Reference (1.00) |  |  |  |  |
| 10-20 | 1.20 (0.86, 1.68) | 0.290 |  |  |  |
| ≥ 20 | **1.54 (1.11, 2.12)** | **0.009** |  |  |  |
| **Training of exercise prescription** |  |  |  |  |  |
| Not trained | Reference (1.00) |  |  |  |  |
| Trained | **3.88 (2.98, 5.06)** | **<0.001** |  |  |  |

**Abbreviations:** OR, Odds Ratio; CI, Confidence Interval.

**Table S5 Ordinal Logistic Regression Analysis of Exercise Prescription and Associated Variables Among Nurses**

|  | **Univariable analysis** |  |  | **Multivariable analysis** |  |
| --- | --- | --- | --- | --- | --- |
| **Variables** | **OR (95% CI )** | ***p* value** | **Variables** | **OR (95% CI )** | ***p* value** |
| **Sex** |  |  | **City level** |  |  |
| Male | Reference (1.00) |  | First-tier cities | Reference (1.00) |  |
| Female | 1.29 (0.42, 3.98) | 0.656 | Second-tier cities | 0.80 (0.53, 1.20) | 0.279 |
| **Education level** |  |  | Third-tier and below cities | 1.45 (0.97, 2.17) | 0.067 |
| Associate degree or below | Reference (1.00) |  | **Department** |  |  |
| Undergraduate degree | 0.86 (0.60, 1.24) | 0.42 | Geriatrics | Reference (1.00) |  |
| Postgraduate degree or above | 0.70 (0.29, 1.73) | 0.44 | General practice | 1.33 (0.82, 2.15) | 0.247 |
| **Level of working city** |  |  | Internal medicine | 0.76 (0.52, 1.12) | 0.167 |
| First-tier cities | Reference (1.00) |  | Others | 1.22 (0.82, 1.80) | 0.335 |
| Second-tier cities | 0.68 (0.47, 0.98) | 0.039 | **Training** |  |  |
| Third-tier and below cities | 1.20 (0.82, 1.74) | 0.355 | **Not trained** | Reference (1.00) |  |
| **Level of working hospital** |  |  | **Trained** | 2.49 (1.85, 3.35) | **<0.001** |
| Tertiary hospital | Reference (1.00) |  |  |  |  |
| Secondary hospital | 1.10 (0.81, 1.50) | 0.54 |  |  |  |
| Primary hospital | 1.06 (0.73, 1.54) | 0.764 |  |  |  |
| **Department** |  |  |  |  |  |
| Geriatrics | Reference (1.00) |  |  |  |  |
| General practice | 1.08 (0.69, 1.71) | 0.735 |  |  |  |
| Internal medicine | 0.73 (0.51, 1.04) | 0.08 |  |  |  |
| Others | 0.96 (0.67, 1.39) | 0.842 |  |  |  |
| **Years of working experience, years** |  |  |  |  |  |
| **<10** | Reference (1.00) |  |  |  |  |
| **10-20** | 0.91 (0.66, 1.24) | 0.545 |  |  |  |
| **≥ 20** | 1.01 (0.70, 1.45) | 0.973 |  |  |  |
| **Training of exercise prescription** |  |  |  |  |  |
| **Not trained** | Reference (1.00) |  |  |  |  |
| **Trained** | 2.45 (1.84, 3.28) | **<0.001** |  |  |  |

**Abbreviations:** OR, Odds Ratio; CI, Confidence Interval.

**
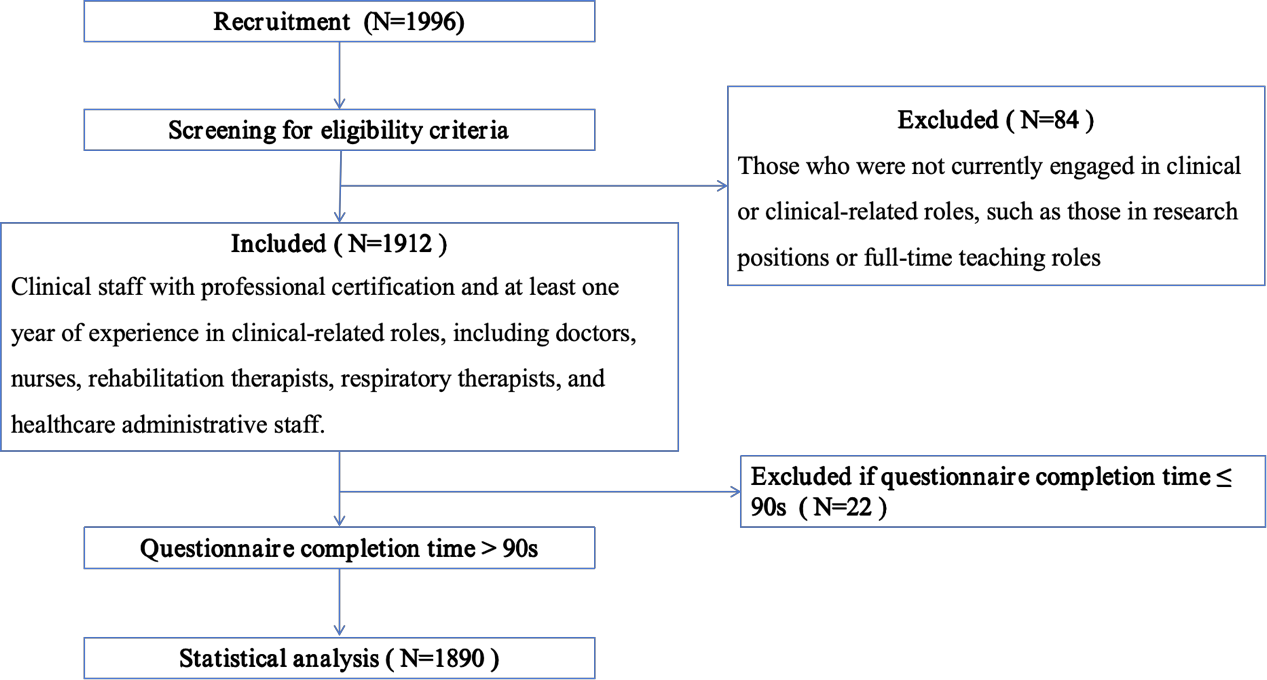
**

**Figure S1 Study flowchart**

**
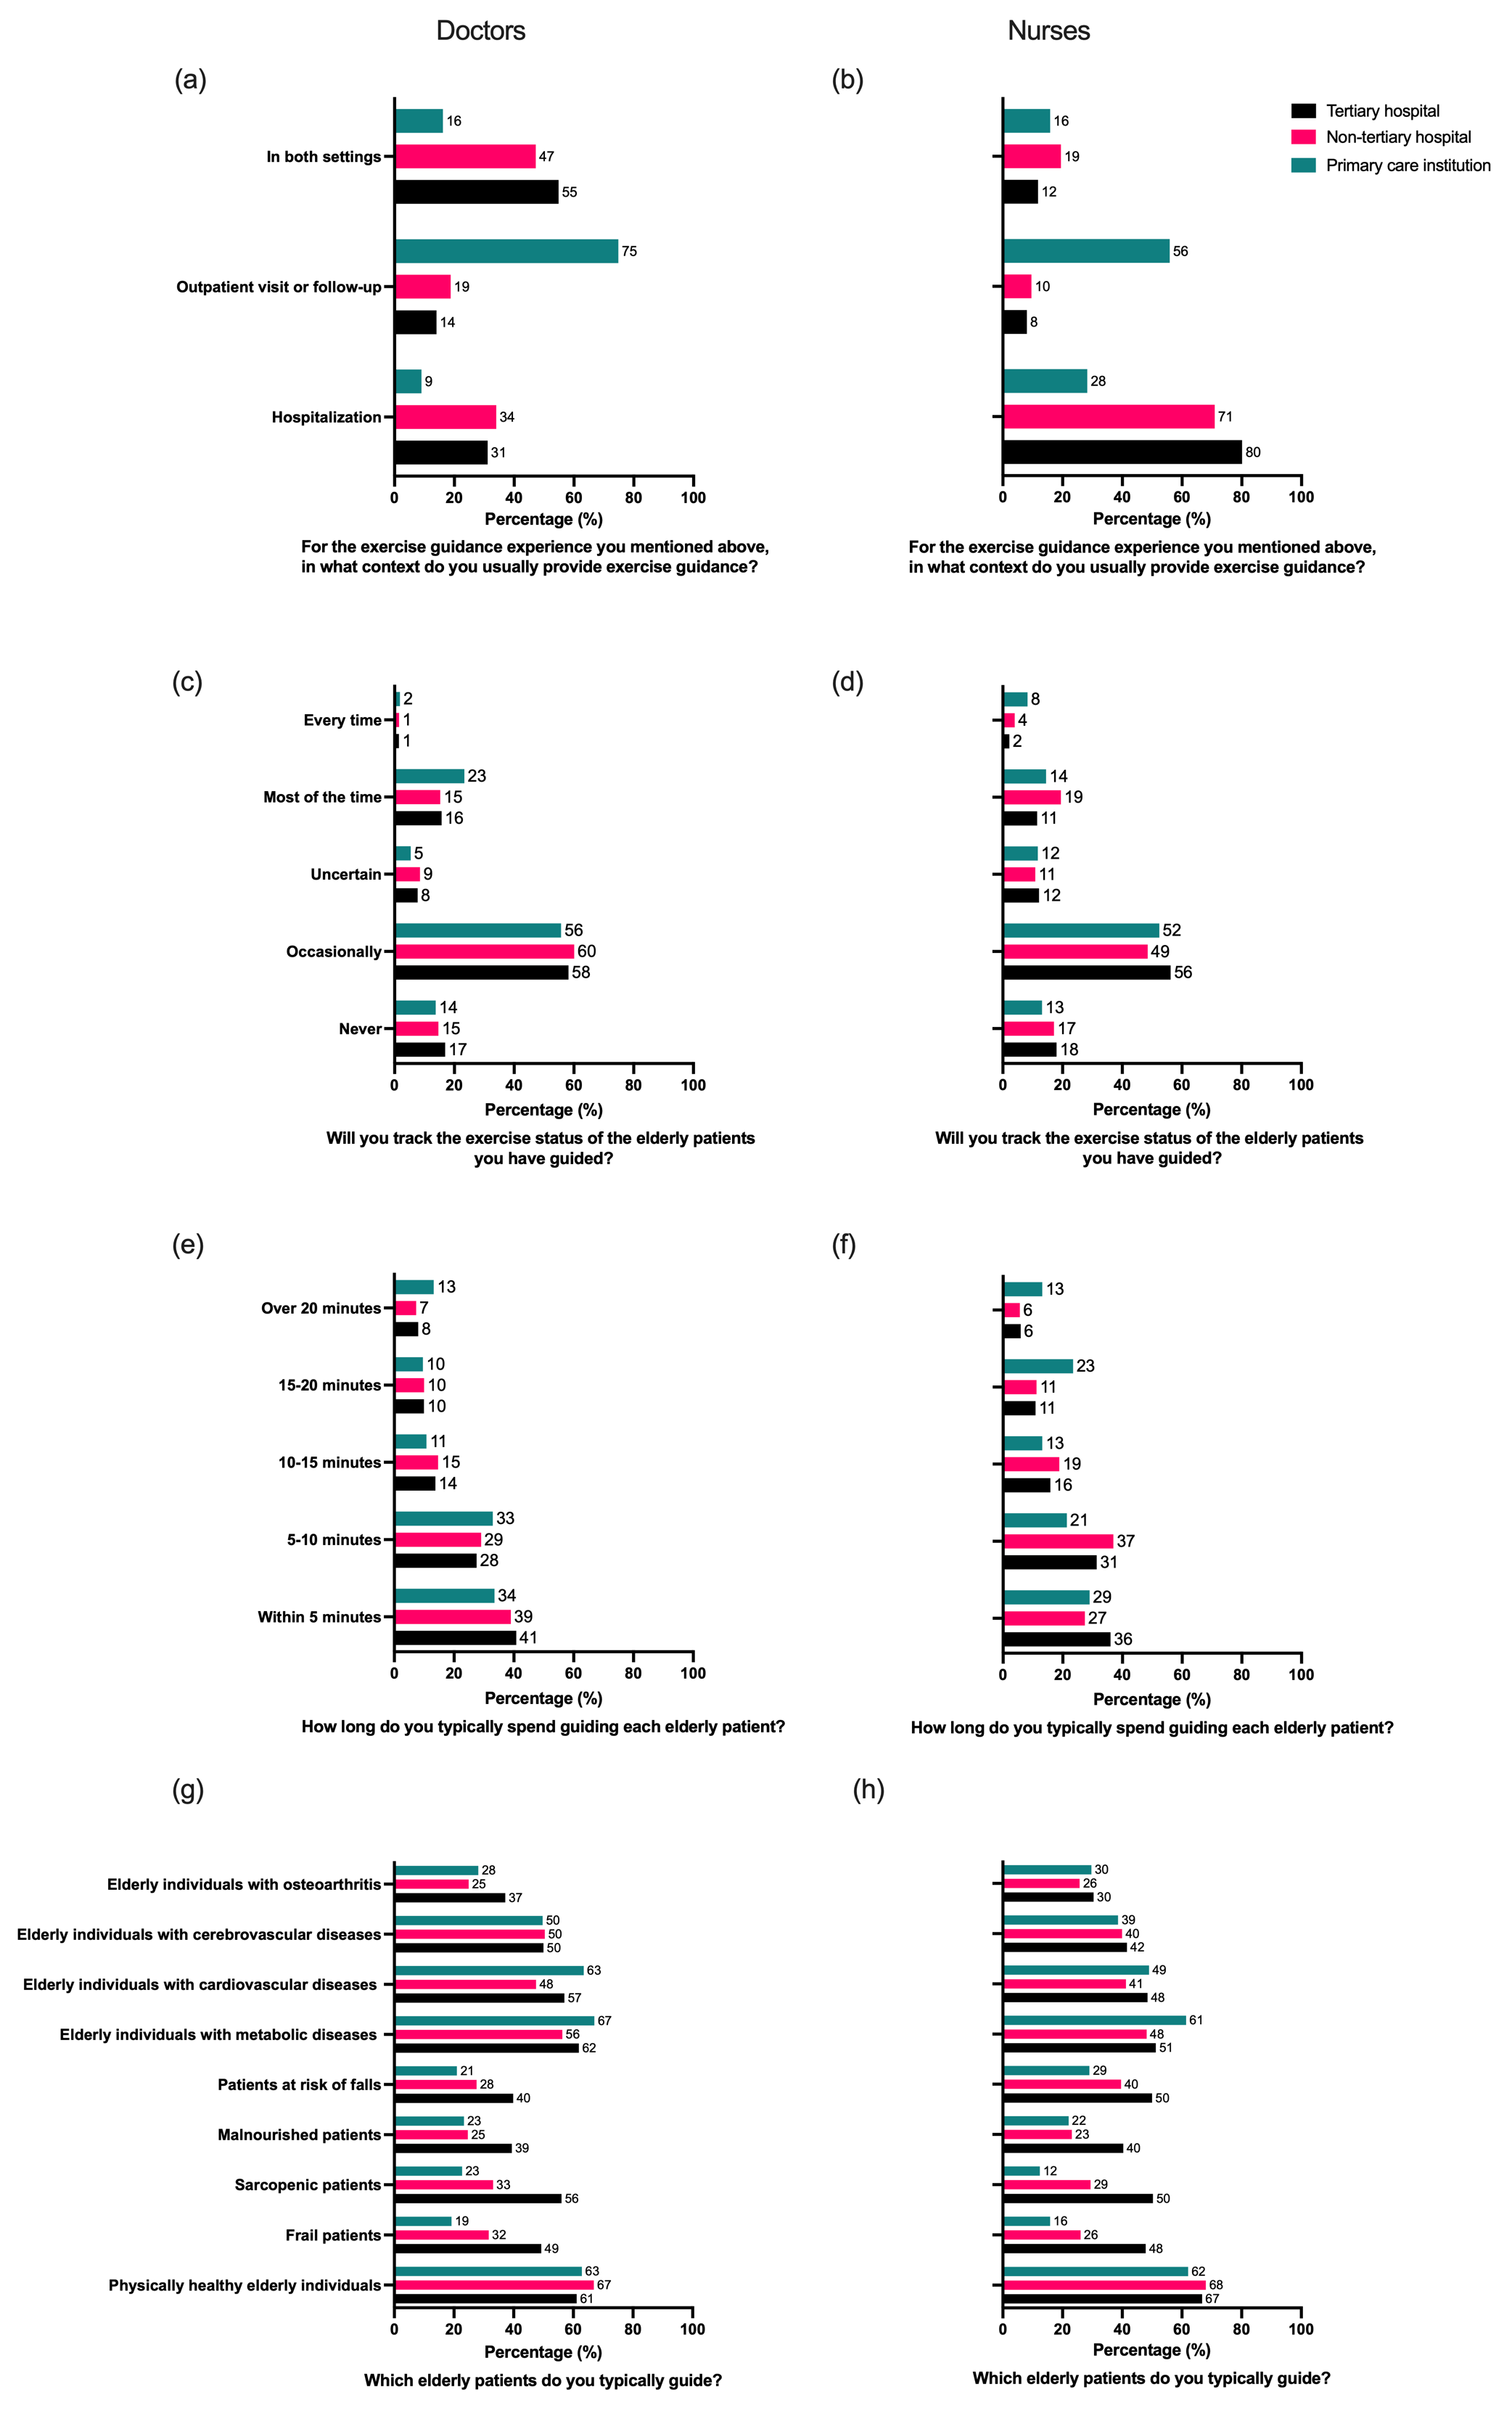
**

**Figure S2 Details of Implementing Exercise Guidance for the older adults**

**Note:** (a) Percentage of doctors responding to the question, "In what context do you usually provide exercise guidance to geriatric patients?" (b) Percentage of nurses responding to the question, "In what context do you usually provide exercise guidance to geriatric patients?" (c) Percentage of doctors responding to the question, "Will you track the exercise status of the older adults patients you have guided?" (d) Percentage of nurses responding to the question, "Will you track the exercise status of the older adults you have guided?" (e) Percentage of doctors responding to the question, "How long do you typically spend guiding each geriatric patient?" (f) Percentage of doctors responding to the question, "How long do you typically spend guiding each geriatric patient?" (g) Percentage of doctors responding to the question, "Which geriatric patients do you typically guide in exercise prescription?" (h) Percentage of doctors responding to the question, "Which geriatric patients do you typically guide in exercise prescription?"

**
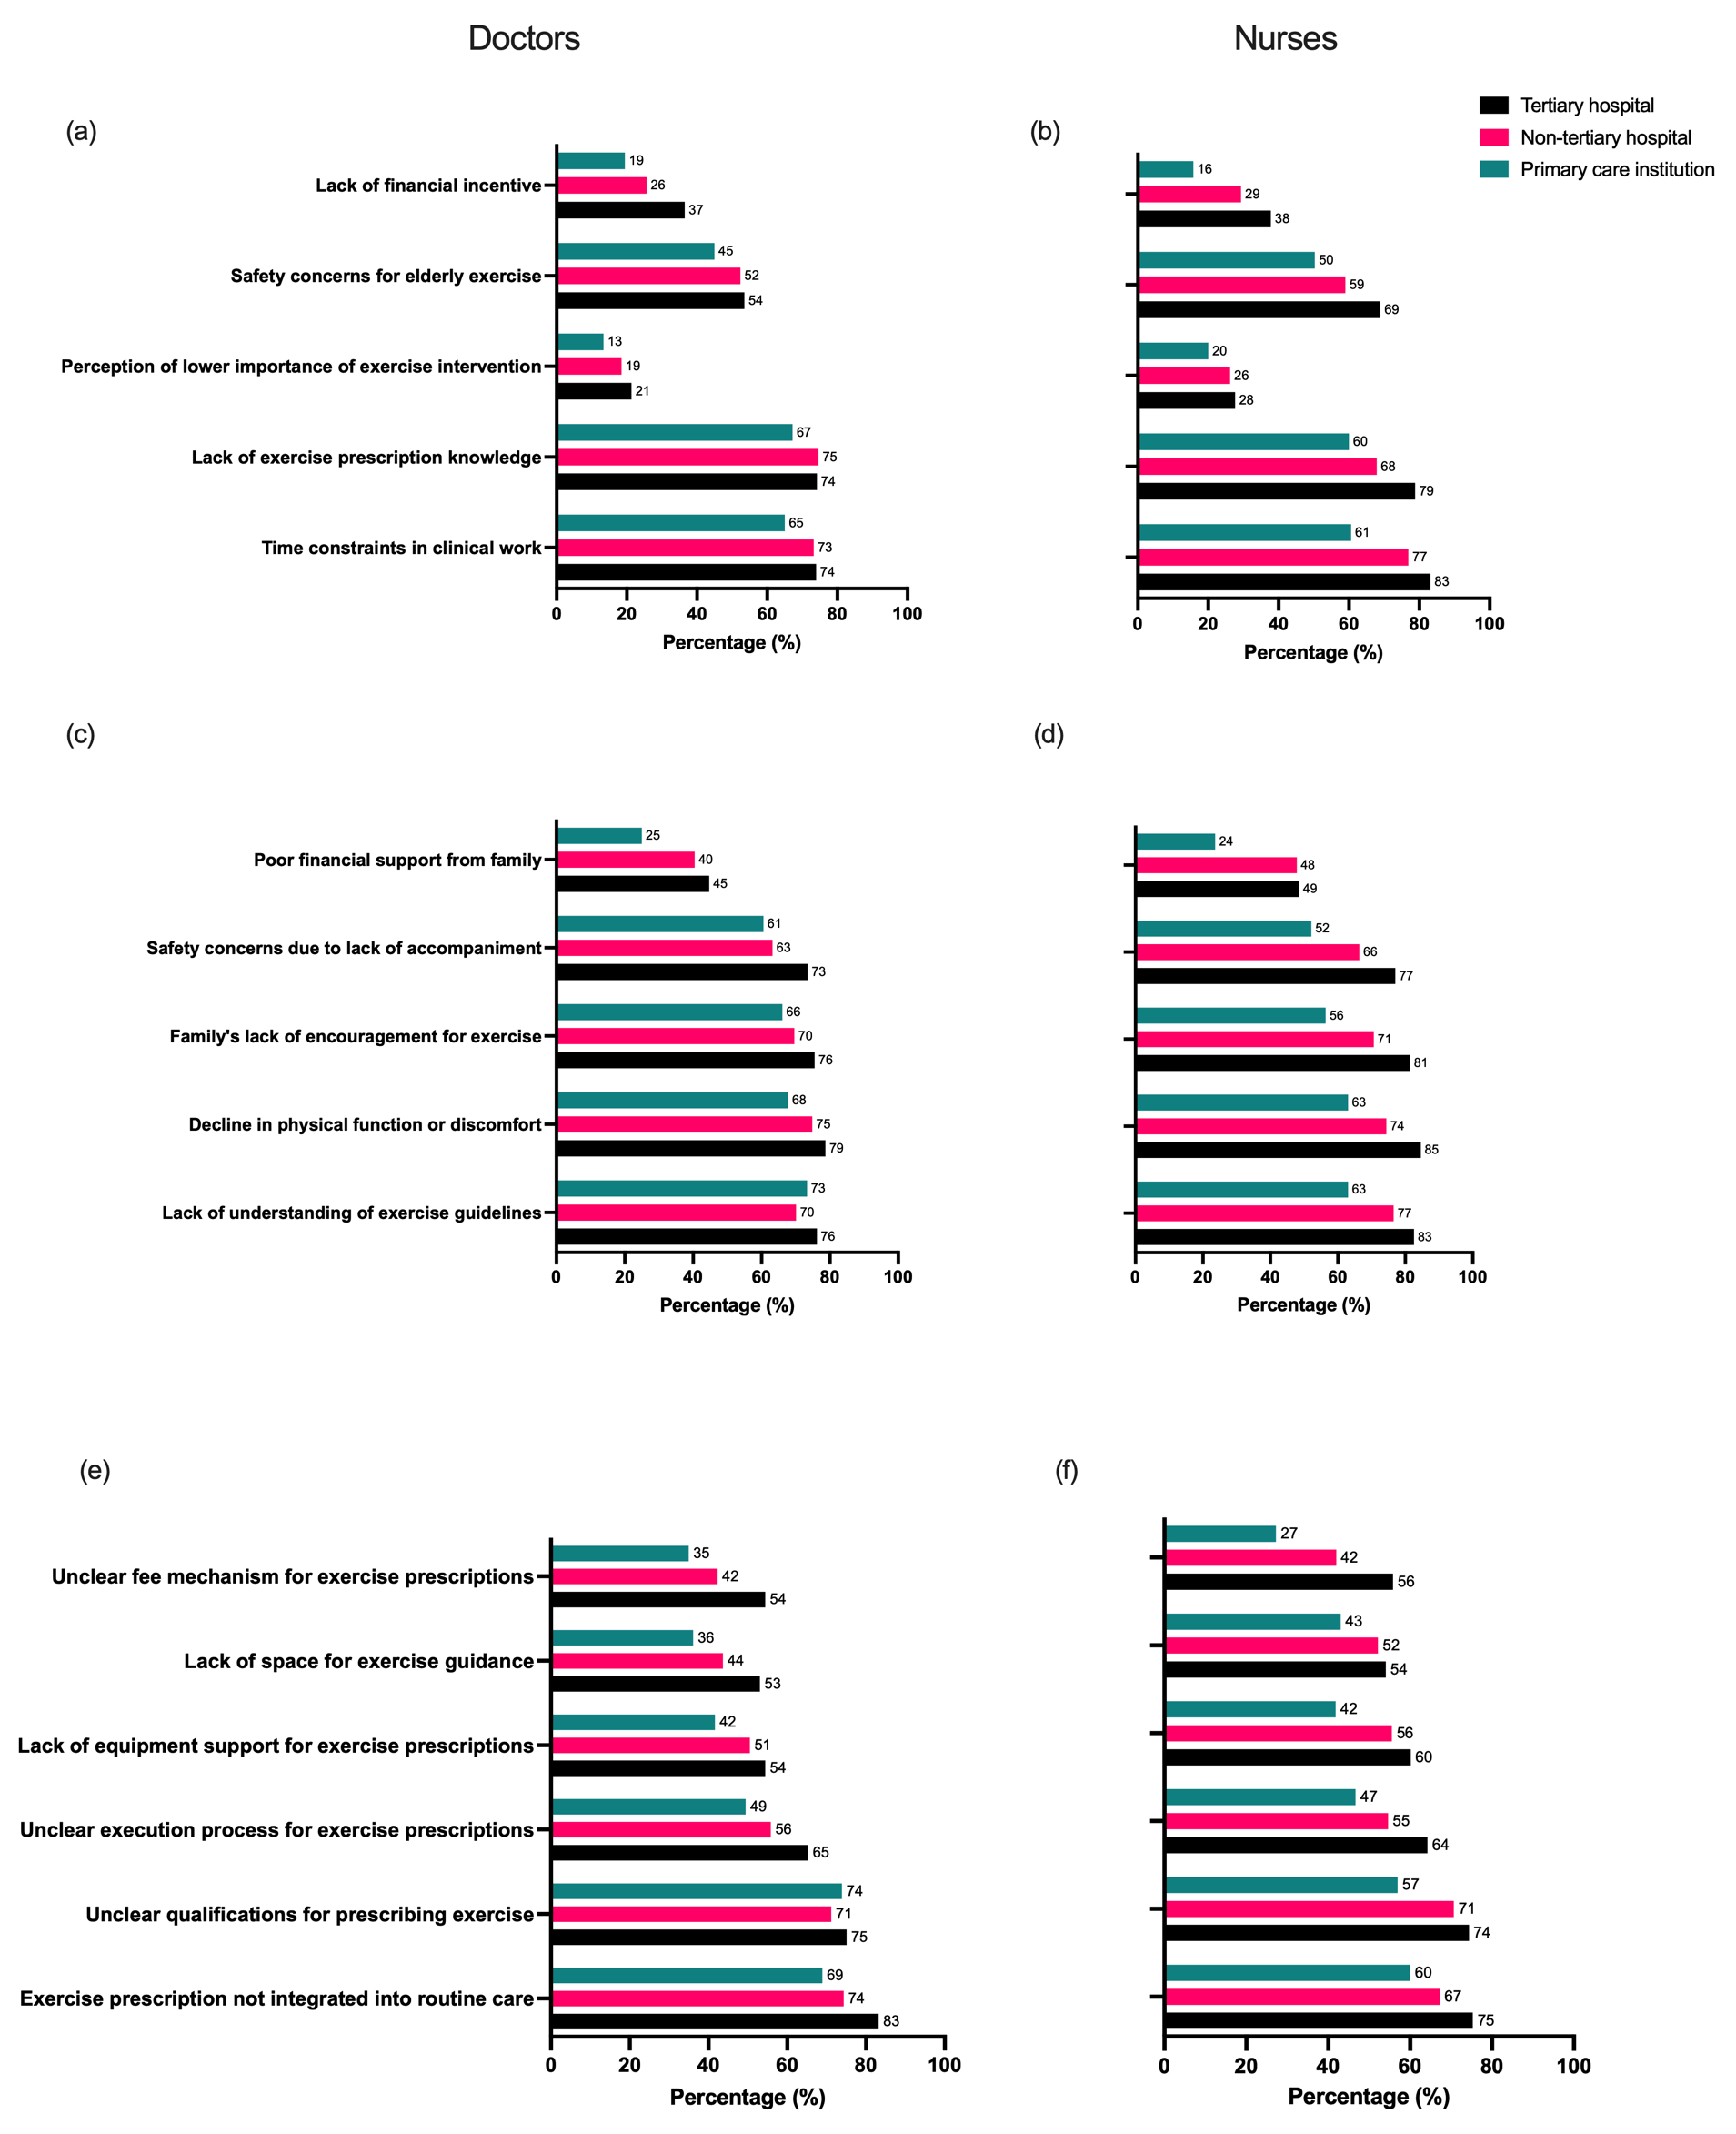
**

**Figure S3 Reported Factors Affecting the Implementation of Exercise Prescriptions Stratified by Doctors and Nurses**

**Note:** (a) Perceived factors influencing the implementation of exercise prescriptions reported by doctors at healthcare professionals level. (b) Perceived factors influencing the implementation of exercise prescriptions reported by nurses at healthcare professionals level. (c) Perceived factors influencing the implementation of exercise prescriptions reported by doctors at the older adults and family level. (d) Perceived factors influencing the implementation of exercise prescriptions reported by nurses at the older adults and family level. (e) Perceived factors influencing the implementation of exercise prescriptions reported by doctors at the healthcare system level. (f) Perceived factors influencing the implementation of exercise prescriptions reported by nurses at the healthcare system level.

**
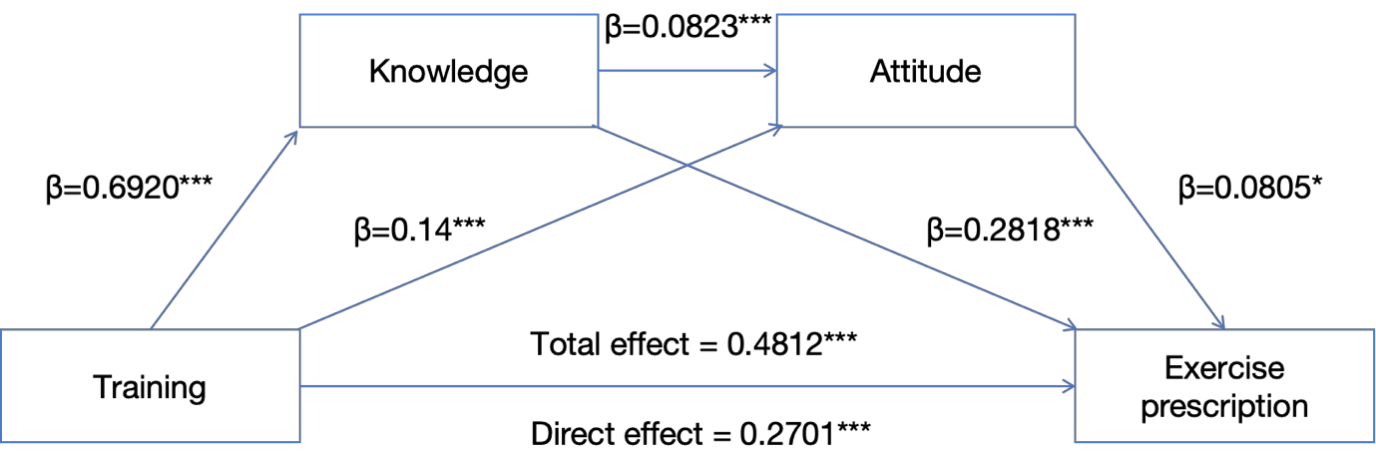
**

**Figure S4 Mediation Analysis Diagram**

**Note:** * *p* < 0.05; ****p* < 0.001
