# Supplementary material for: Implementation gap and influencing factors of exercise prescription for older adults: A large-scale survey of healthcare professionals in China
Source: Research Square preprint supplement (doi:10.21203/rs.3.rs-6464565/v1), 2025-06-09
Supplement: Supplementary file 2 [file bd8b77f56eec92b2ba7f2b40.docx]

**Survey on the Current Status of Exercise Prescription Implementation for Older Adults**

Dear Sir/Madam,

We are conducting a study on healthcare professionals' perceptions of the current status of exercise prescription implementation for older adults. Your participation is crucial to help us understand the current dissemination of exercise prescriptions and provide insights for improving their future implementation. Please complete the following questions truthfully. Your responses will be kept anonymous. The questionnaire is expected to take 5-10 minutes to complete. Thank you for your cooperation!

**Do you agree to participate in this survey?**

[1] Yes, proceed

[2] No, exit

**Section 1: Basic Information**

1.1. What is your sex?

[1] Male

[2] Female

1.2. Your age: ______ (years)

1.3. Your highest level of education (please include part-time degrees if applicable):

[1] Associate degree or below

[2] Undergraduate degree

[3] Postgraduate degree or above

1.4. Your workplace: ___ (Province) ____ (City)

1.5. Your professional title:

[1] Junior or below

[2] Intermediate

[3] Associate senior

[4] Senior

1.6. Your job role:

[1] Doctor

[2] Nurse

[3] Rehabilitation therapist

[4] Respiratory therapist

[5] Administrative staff

[6] Other: ___

1.7. The level of your institution:

[1] Tertiary hospital

[2] Secondary hospital

[3] Community health service center

[4] Other: ___

1.8. Your department:

[1] Geriatrics

[2] General practice

[3] Internal medicine

[5] Other: ___

1.9. Your years of work experience: __ years (clinical years, excluding internship)

**Section 2: Knowledge of Exercise Prescription**

2.1. Exercise prescription is a personalized exercise plan designed by healthcare professionals to help patients improve health, prevent diseases, or support rehabilitation. How much do you know about exercise prescription?

1. Completely unaware
2. Slightly aware
3. Moderately aware
4. Mostly aware
5. Extremely aware

2.2. Exercise prescriptions can provide exercise guidance for both healthy and diseased populations. How familiar are you with the target population for exercise prescriptions?

1. Completely unaware
2. Slightly aware
3. Moderately aware
4. Mostly aware
5. Extremely aware

2.3. The 2021 WHO Guidelines on Physical Activity and Sedentary Behaviour recommend that older adults, regardless of chronic conditions, should engage in at least 150-300 minutes of moderate-intensity or 75-150 minutes of high-intensity aerobic activity per week. How much do you know about the recommended weekly aerobic exercise amount and intensity for older adults?

1. Completely unaware
2. Slightly aware
3. Moderately aware
4. Mostly aware
5. Extremely aware

2.4. In addition to aerobic exercise, the 2021 WHO guidelines and other recommendations suggest older adults should engage in muscle-strengthening activities at least two days a week, along with balance and strength training at least three days a week. How much do you know about the recommended muscle strengthening, balance, and resistance training for older adults?

1. Completely unaware
2. Slightly aware
3. Moderately aware
4. Mostly aware
5. Extremely aware

2.5. Have you previously received training related to exercise prescriptions (e.g., continuing education courses, academic forums, specialized conferences)?

[1] Yes

[2] No

**Section 3: Attitudes Toward Exercise Prescription Implementation**

3.1. Do you think it is important to prescribe exercise for older adults in clinical practice?

[1] Very important

[2] Quite important

[3] Uncertain

[4] Not very important

[5] Not important at all

3.2. Do you think it is necessary for healthcare professionals to receive specialized training in designing exercise prescriptions for older adults?

[1] Very necessary

[2] Quite necessary

[3] Uncertain

[4] Not very necessary

[5] Not necessary at all

3.3. Exercise prescriptions are not yet widely implemented in clinical practice. How difficult do You think it is to implement exercise prescriptions for older adults in current clinical practice?

[1] Very difficult

[2] Quite difficult

[3] Uncertain

[4] Quite easy

[5] Very easy

3.4. How confident are you in your current knowledge and skills related to exercise prescriptions?

[1] Very confident

[2] Quite confident

[3] Uncertain

[4] Not very confident

[5] Not confident at all

3.5. Would you be willing to learn more about exercise prescription knowledge and skills in the future?

[1] Very willing

[2] Quite willing

[3] Uncertain

[4] Not very willing

[5] Not willing at all

**Section 4: Practice of Exercise Prescription**

4.1. Have you ever provided exercise guidance to older patients in your clinical practice?

1. Never
2. Brief Verbal Reminder(simply advising patients to increase physical activity without detailed guidance)
3. Detailed Verbal Reminder(which included specific advice on exercise type, amount, frequency, and goals)
4. Written Prescription Reminder
5. Uncertain

4.1a. In what context do you usually provide exercise education or guidance to older patients?

[1] During hospital stay

[2] During outpatient visits or follow-ups

[3] Both inpatient and outpatient settings

4.1b. How often do you follow up on the exercise progress of older patients?

1. Never
2. Occasionally
3. Uncertain
4. Most of the time
5. Every time

4.1c. On average, how much time do you spend providing exercise guidance to each older patient?

Within 5 minutes

1. 5-10 minutes
2. 10-15 minutes
3. 15-20 minutes
4. Over 20 minutes

4.2. What factors influence the implementation of exercise prescriptions?

4.2a. Healthcare professional Level:

[1] Time constraints in clinical work

[2] Lack of exercise prescription knowledge

[3] Perception of lower importance of exercise intervention

[4] Safety concerns for elderly exercise (e.g., fear of falls)

[5] Lack of financial incentive

[6] Other: ___

4.2b. Older adult and family Level:

[1] Lack of understanding of exercise guidelines

[2] Decline in physical function or discomfort

[3] Family's lack of encouragement for exercise

[4] Safety concerns due to lack of accompaniment

[5] Poor financial support from family

[6] Other: ___

4.2c. Healthcare System Level:

[1] Exercise prescription not integrated into routine care

[2] Unclear qualifications for prescribing exercise

[3] Unclear execution process for exercise prescriptions

[4] Lack of equipment support for exercise prescriptions

[5] Lack of space for exercise guidance

[6] Unclear fee mechanism for exercise prescriptions (e.g., absence of billing mechanisms, not covered by insurance).

[7] Other ___

4.3. How confident are you in your ability to follow guidelines and issue exercise prescriptions and provide exercise guidance for older adults in clinical practice in the future?

[1] Very confident

[2] Somewhat confident

[3] Uncertain

[4] Not very confident

[5] Not confident at all

4.4. Do you have additional insights and suggestions on implementing exercise prescriptions for the elderly? (Optional)

**Thank you for your cooperation!**
